# Supplementary material for: Identification of FDA-approved drugs targeting the Farnesoid X Receptor
Source: PubMed Central journal article supplement (PMC6379390; doi:10.1038/s41598-019-38668-7), 2019-02-18
Supplement: 41598_2019_38668_MOESM1_ESM.pdf [file 41598_2019_38668_MOESM1_ESM.pdf]

## **Supplementary Data**

### **Identification of FDA-approved drugs targeting the Farnesoid X receptor**

Sandra M.W. van de Wiel<sup>1,2</sup>, Ingrid T.G.W. Bijsmans<sup>3</sup>, Saskia W.C. van Mil<sup>1,3</sup> and Stan F.J. van de Graaf<sup>1,2</sup>

<sup>1</sup>Tytgat Institute for Liver and Intestinal Research & <sup>2</sup>Department of Gastroenterology and Hepatology, Amsterdam Gastroenterology and Metabolism, Amsterdam UMC, University of Amsterdam, Amsterdam, the Netherlands. <sup>3</sup>Center for Molecular Medicine, UMC Utrecht, Utrecht University, Utrecht, The Netherlands.

# Supplement Figure 1

A

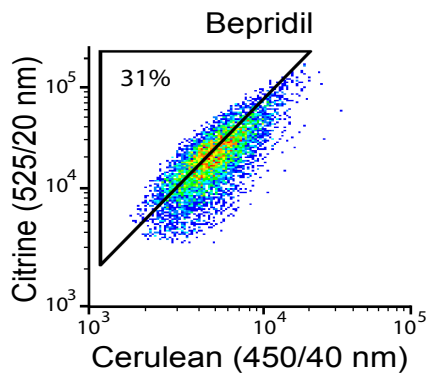

B

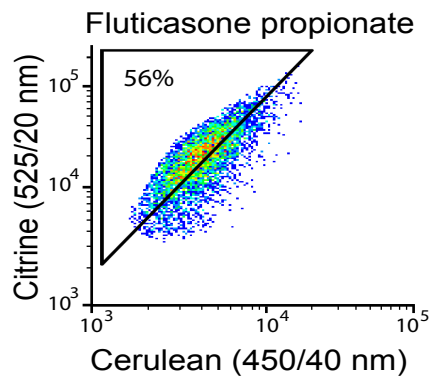

C

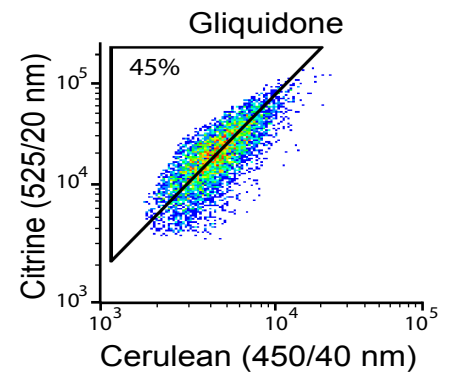

D

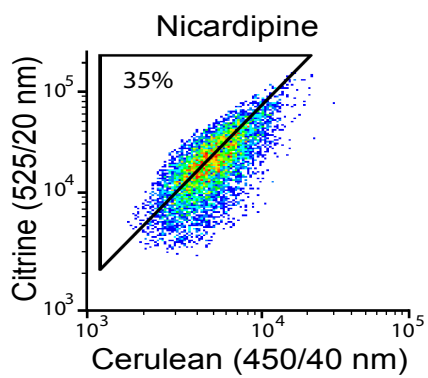

E

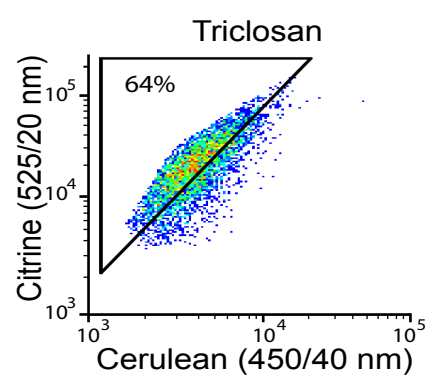

# Supplement Figure 2

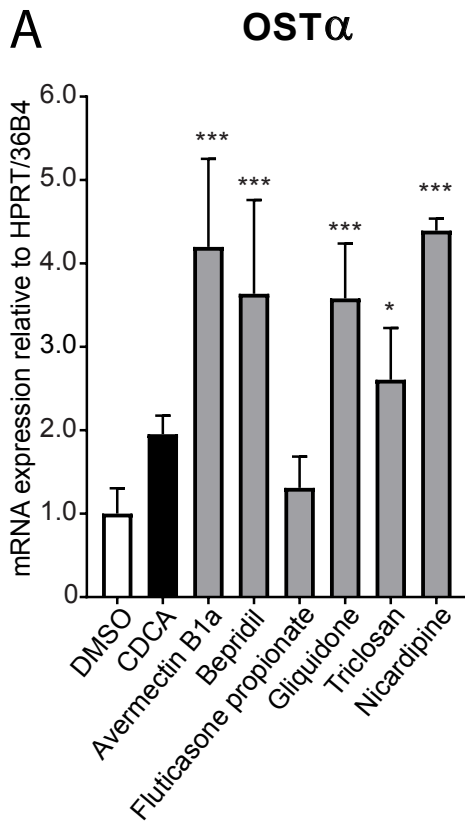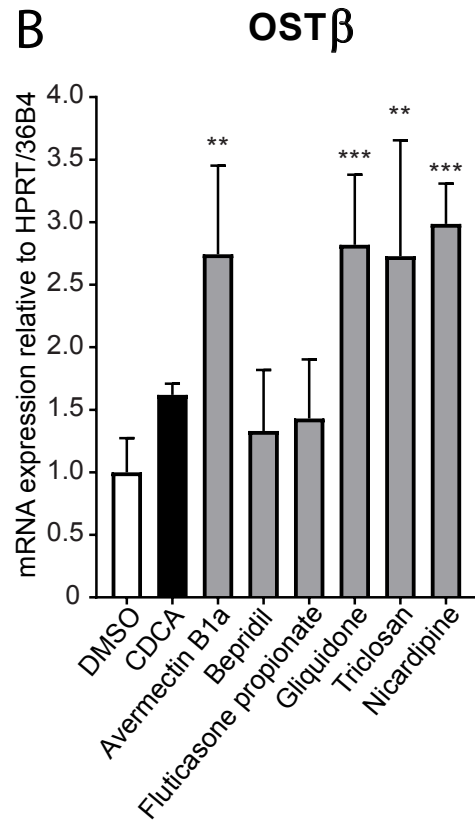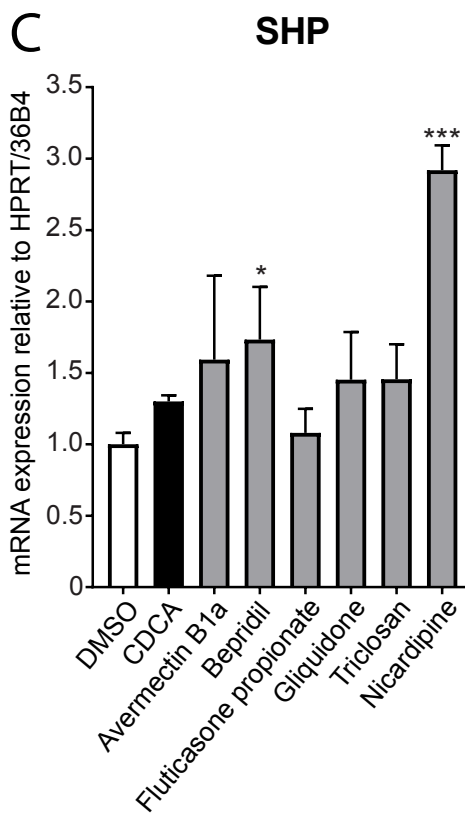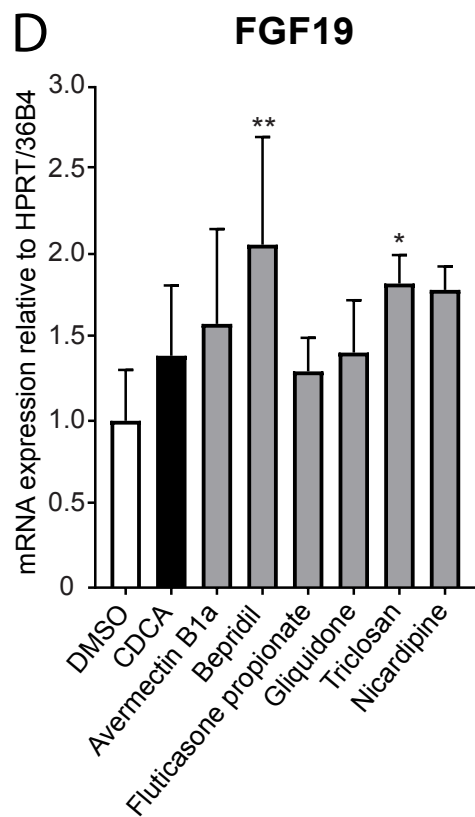

**Supplementary figure 1:** Representative FACS-plots of five hits showing the amount of FRET+ cells after 30 minute treatment with negative control (DMSO), positive control (GW4064) or 10  $\mu$ M of compound dissolved in DMSO. Numbers indicate the percentages of cells within the FRET gate.

**Supplementary figure 2:** Compounds directly increase FXR target gene expression. (A-E) Huh7 cells were treated for 6 hours with either DMSO, 10  $\mu$ M CDCA or 10  $\mu$ M compound and were analysed for gene expression of FXR target genes *OST $\alpha$* , *OST $\beta$* , *SHP* and *FGF19*. This experiment (n=4) was performed in duplicate. Data is given as means  $\pm$  SD. Significance is measured relative to DMSO controls. \*p < .05 (One-way ANOVA; post hoc: Dunnett's multiple comparison).

# Identification of FDA-approved drugs targeting the Farnesoid X receptor

Sandra M.W. van de Wiel<sup>1,2</sup>, Ingrid T.G.W. Bijmans<sup>3</sup>, Saskia W.C. van Mil<sup>1,3</sup> and Stan F.J. van de Graaf<sup>1,2</sup>

<sup>1</sup>Tytgat Institute for Liver and Intestinal Research & <sup>2</sup>Department of Gastroenterology and Hepatology, Amsterdam Gastroenterology and Metabolism, Amsterdam UMC, University of Amsterdam, Amsterdam, the Netherlands. <sup>3</sup>Center for Molecular Medicine, UMC Utrecht, Utrecht University, Utrecht, The Netherlands.

## Supplementary table 1

Primer list for RT-qPCR analysis

| Gene                          | Forward primer (5'-3')  | Reverse primer (5'-3')    |
|-------------------------------|-------------------------|---------------------------|
| <i>HPRT</i>                   | TGACCTTGATTTATTTGCATACC | CGAGCAAGACGTTTCAGTCCT     |
| <i>36B4</i>                   | TCATCAACGGTACAAACGA     | GCCTTGACCTTTTCAGCAAG      |
| <i>SLC51A</i> (OST $\alpha$ ) | AGATAACGCTGACCCTGGTG    | AATTTGGCTCCCATGTTCTG      |
| <i>SLC51B</i> (OST $\beta$ )  | GCAGCTGTGGTGGTCATTAT    | TAGGCTGTTGTGATCCTTGG      |
| <i>ABCC2</i> (MRP2)           | ACAGAGGCTGGTGGCAACC     | ACCATTACCTTGTCACTGTCCATGA |
| <i>NR0B2</i> (SHP)            | CGCCCTATCATTGGAGATGT    | TGTCTATACAGGCTTGCCCC      |
| <i>FGF19</i>                  | TTTCTCATCACTTCCCCAGG    | AGGCTTCCCCTACTCCTGAA      |
| <i>G6Pase</i>                 | CCTTGCTGCTCATTTTCCTC    | GGCTGGCATTATAGATGCTGT     |
| <i>CYP7A1</i>                 | AATCCATACCTGGGCTGTG     | AGGCAGCGGTCTTTGAGTTA      |
